# Supplementary material for: Self-reactivity controls functional diversity of naive CD8+ T cells by co-opting tonic type I interferon
Source: PubMed Central journal article supplement (PMC8523551; doi:10.1038/s41467-021-26351-3), 2021-10-18
Supplement: 41467_2021_26351_MOESM1_ESM.pdf [file 41467_2021_26351_MOESM1_ESM.pdf]

**Supplementary Information**

**Self-reactivity controls functional diversity of naive CD8<sup>+</sup> T cells by co-opting tonic type I interferon**

Young-Jun Ju, Sung-Woo Lee, Yoon-Chul Kye, Gil-Woo Lee, Hee-Ok Kim, Cheol-Heui Yun,  
and Jae-Ho Cho

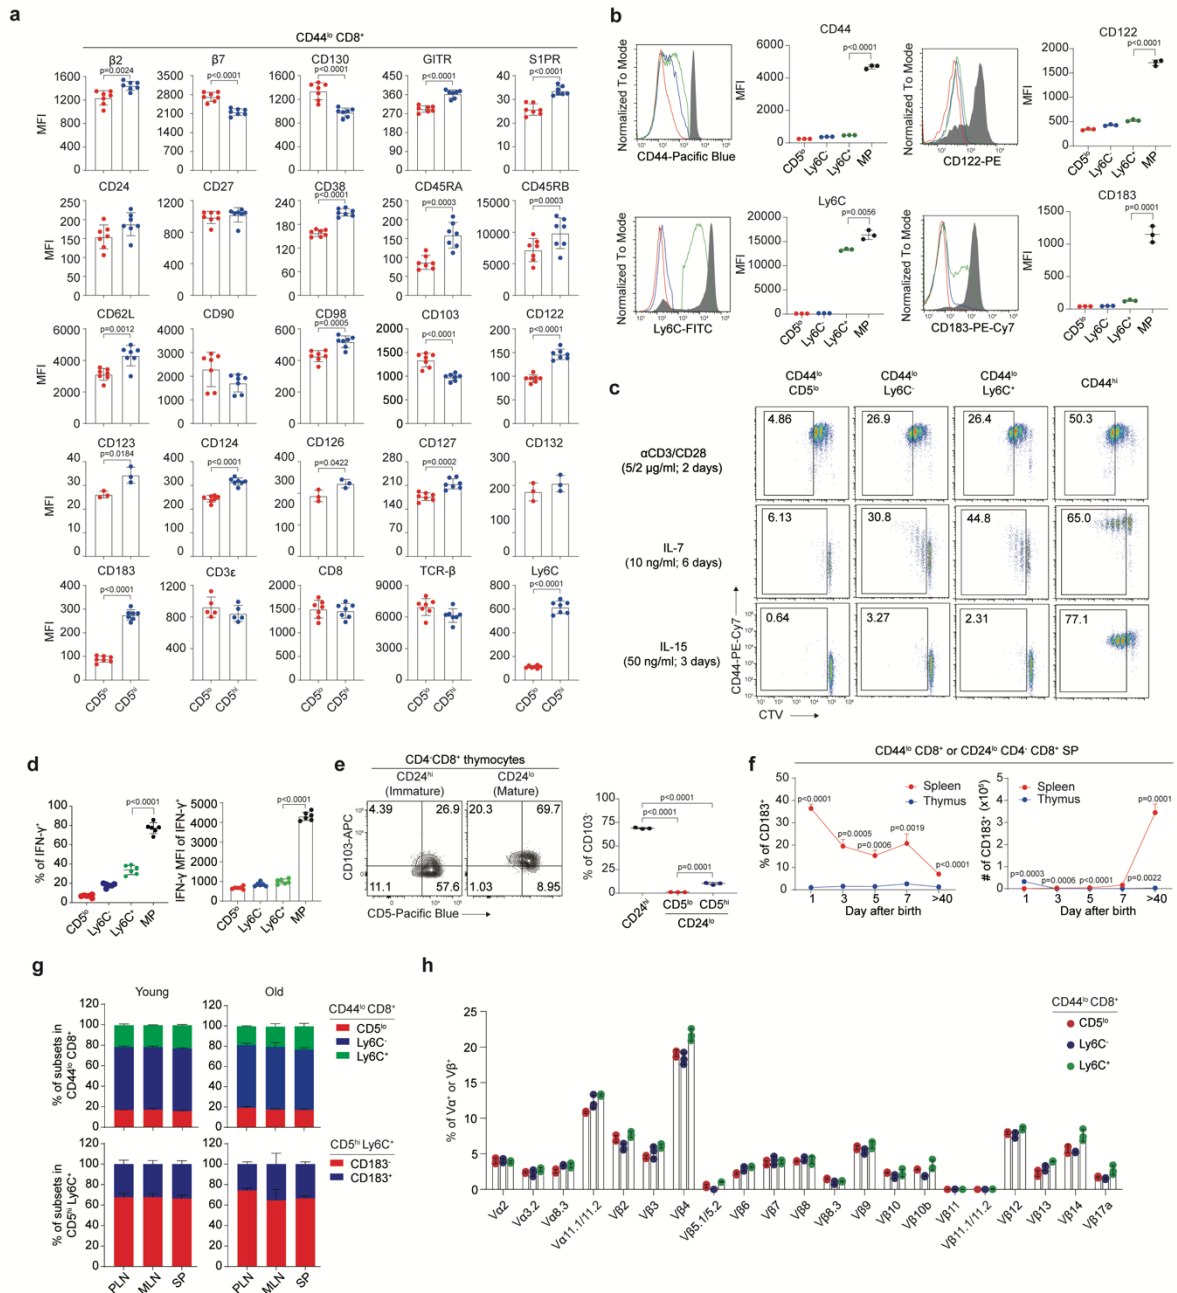

## Supplementary Figure 1

### Phenotypic heterogeneity of peripheral naive CD8<sup>+</sup> T cells

**a**, Expression of various surface molecules on CD5<sup>lo</sup> and CD5<sup>hi</sup> B6 naive CD8<sup>+</sup> T cells (n=7 mice for each group). **b**, Levels of CD44, CD122, Ly6C and CD183 expression in B6 CD8<sup>+</sup> T cell subsets indicated (n=3 mice for each group). **c**, Proliferation of the indicated subsets of B6 CD8<sup>+</sup> T cells after stimulation with plate-bound anti-CD3/CD28, IL-7 or IL-15 in vitro. **d**, IFN-

$\gamma$  production of the indicated subsets of B6 CD8<sup>+</sup> T cells after 5h PMA and ionomycin stimulation in vitro (n=6 mice for each group). **e**, Percentage of CD103<sup>-</sup> cells in CD24<sup>lo</sup> CD5<sup>lo</sup>, CD24<sup>lo</sup> CD5<sup>hi</sup>, and CD24<sup>hi</sup> CD4<sup>-</sup>CD8<sup>+</sup> B6 thymocytes (n=3 mice for each group). **f**, Splenic and thymic CD183<sup>+</sup> B6 naive CD8<sup>+</sup> T cell changes over time after birth (n=3 mice for each group). **g**, Proportions of B6 naive CD8<sup>+</sup> T cell subsets in peripheral lymphoid organs of young adult (4-8 wk) and aged (>1 yr) mice (PLN; peripheral lymph node, MLN; mesenteric lymph node, SP; spleen) (n=3 mice for each group). **h**, Expressions of several TCR variable chain repertoire in B6 naive CD8<sup>+</sup> T cell subsets (n=3 mice for each group). Statistical significance was confirmed by two-tailed unpaired Student's t-test. Results are shown as mean  $\pm$  SD. Data representative of 2-3 independent experiments. Source data are provided as a Source Data file.

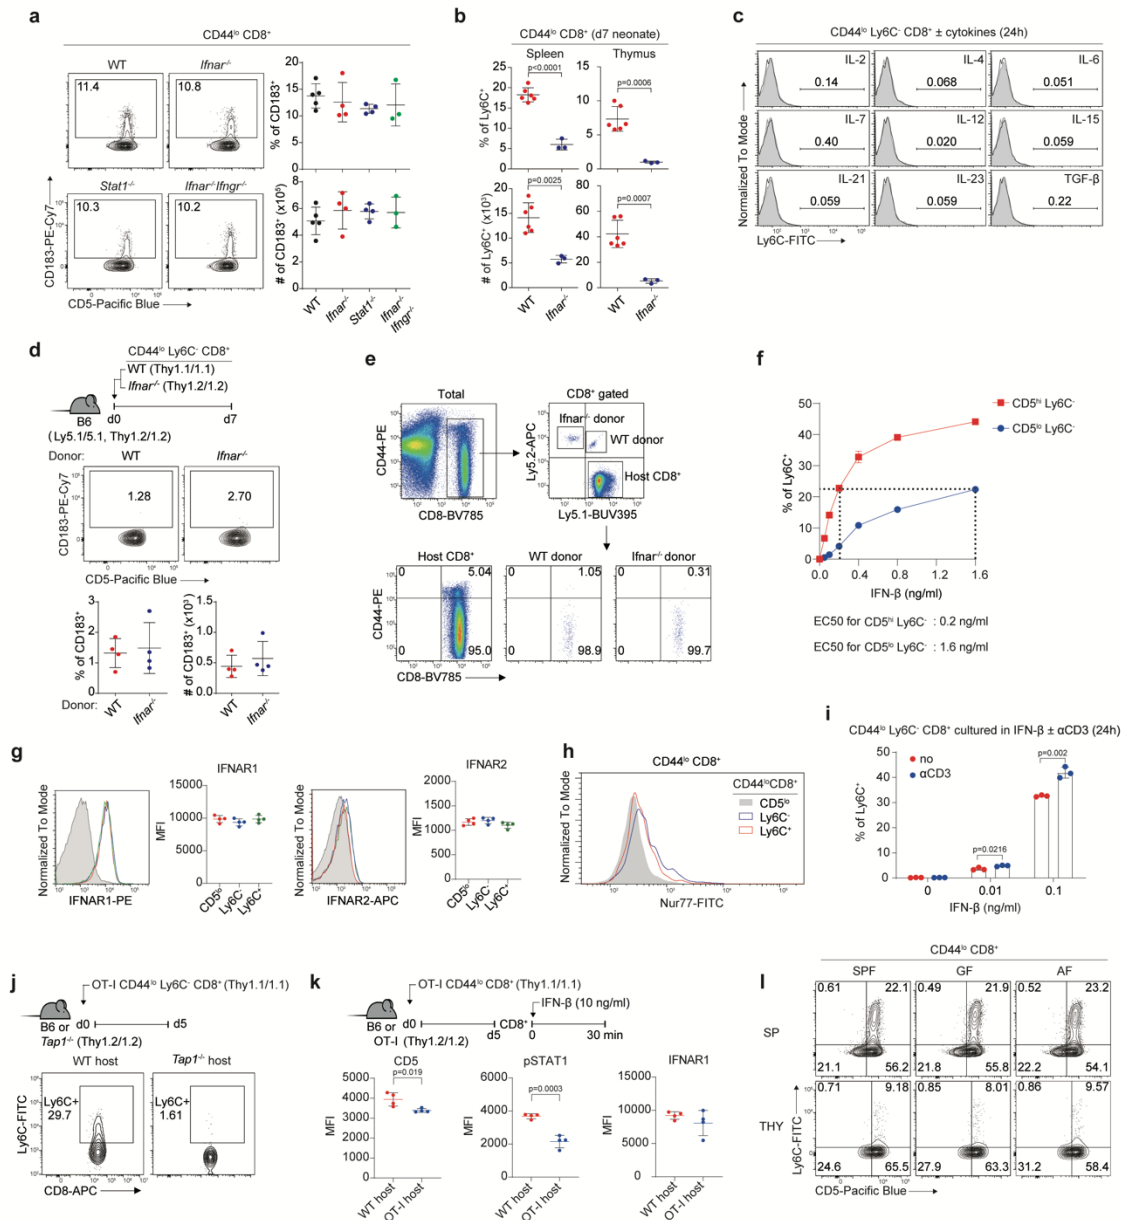

## Supplementary Figure 2

### Effect of type I IFN on Ly6C, CD183, and CD103 expression in naive CD8<sup>+</sup> T cells

- a**, Percentage and absolute number of CD183<sup>+</sup> cells in spleen from different type I IFN signal deficient mice (n=5 for WT, n=4 for *Ifnar*<sup>-/-</sup>, n=4 for *Stat1*<sup>-/-</sup>, n=3 for *Ifnar*<sup>-/-</sup> *Ifngr*<sup>-/-</sup> mice).
- b**, Percentage and absolute of Ly6C<sup>+</sup> cells in spleen and thymus from WT and *Ifnar*<sup>-/-</sup> neonatal mice (n=6 for WT, n=3 *Ifnar*<sup>-/-</sup> mice).
- c**, Percentage of induced Ly6C<sup>+</sup> cells from B6 CD44<sup>lo</sup>Ly6C<sup>-</sup> cells cultured with various cytokines.
- d** and **e**, Percentage and absolute of

CD183<sup>+</sup> CD8<sup>+</sup> T cells (n=4 mice for each group) (**d**) and CD44 expression profile (**e**) from WT and *Ifnar*<sup>-/-</sup> CD44<sup>lo</sup>Ly6C<sup>-</sup> donor cells. **f**, Percentage of induced Ly6C<sup>+</sup> cells from B6 CD44<sup>lo</sup>Ly6C<sup>-</sup> CD5<sup>lo</sup> and CD5<sup>hi</sup> cells cultured with various amounts of IFN- $\beta$  (n=3 mice for each group). **g** and **h** Expression of IFNAR1 and IFNAR2 (n=4 mice for each group) (**g**) and Nur77 expression (**h**) on CD5<sup>lo</sup>, Ly6C<sup>-</sup>, and Ly6C<sup>+</sup> naive CD8<sup>+</sup> T cells. **i**, Percentage of induced Ly6C<sup>+</sup> cells from CD5<sup>lo</sup> and Ly6C<sup>-</sup> B6 naive T cells cultured with IFN- $\beta$  with or without soluble anti-CD3 (n=3 mice for each group). **j**, Percentage of Ly6C<sup>+</sup> cells induced from Ly6C<sup>-</sup> naive OT-I CD8<sup>+</sup> T cells transferred to WT or *Tap1*<sup>-/-</sup> hosts. **k**, Levels of CD5, phospho-STAT1 and IFNAR1 expression in OT-I donor cells transferred to B6 or OT-I hosts (n=4 mice for each group). **l**, Percentage of naive CD8<sup>+</sup> T cell subsets from SPF, GF, and AF mice. Statistical significance was confirmed by two-tailed unpaired Student's t-test. Results are shown as mean  $\pm$  SD. Data representative of 2-3 independent experiments. Source data are provided as a Source Data file.

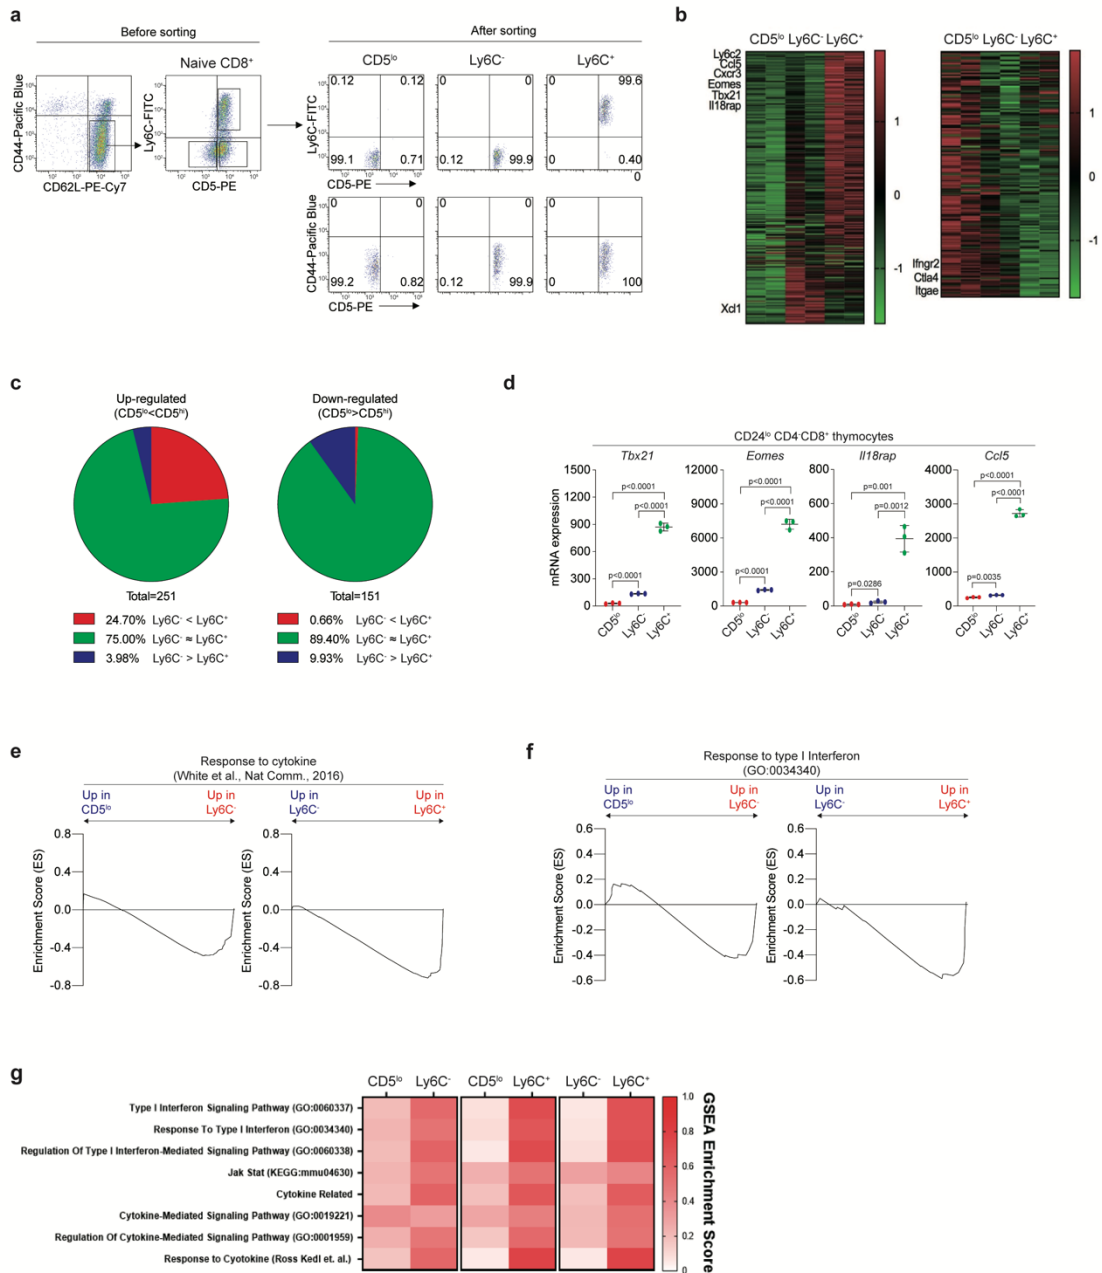

### Supplementary Figure 3

#### Different transcriptomes in distinct subsets of naive CD8<sup>+</sup> T cells

**a**, Gating strategy and purity before and after cell sorting. **b**, Microarray of CD5<sup>lo</sup>, Ly6C<sup>-</sup> and Ly6C<sup>+</sup> cells were performed to generate the heat map that shows genes that are either up-regulated (n=328 genes) (left panel) or down- (n=151 genes) (right panel) in CD5<sup>hi</sup> cells compared to CD5<sup>lo</sup> cells. The color scale is based on Z-score scaling from -1.75 (Green) to 1.75 (Red). **c**, Pie charts illustrating genes that are regulated similarly or differently in Ly6C<sup>-</sup>

and Ly6C<sup>+</sup> cells in up- (left panel) or down-regulated (right panel) genes. **d**, RT-PCR results of *Tbx21*, *Eomes*, *Il18rap*, and *Ccl5* genes in CD5<sup>lo</sup>, Ly6C<sup>-</sup> and Ly6C<sup>+</sup> CD24<sup>lo</sup>CD4<sup>-</sup>CD8<sup>+</sup> thymocytes (n=3 mice for each group). Y-axis represent relative mRNA expression. Statistical significance was confirmed by two-tailed unpaired Student's t-test. Results are shown as mean  $\pm$  SD. Data representative of two independent experiments. **e** and **f**, GSEA results between CD5<sup>lo</sup> and Ly6C<sup>-</sup>, or Ly6C<sup>-</sup> and Ly6C<sup>+</sup> cells for pathway: Response to cytokine (White et al., Nat Comm., 2016) (**e**) and Response to type I IFN (GO:0034340) (**f**). **g**, GSEA were performed between CD5<sup>lo</sup> and Ly6C<sup>-</sup>, CD5<sup>lo</sup> and Ly6C<sup>+</sup>, or Ly6C<sup>-</sup> and Ly6C<sup>+</sup> cells for indicated pathways. GSEA Enrichment Score (ES) represent either minimum or maximum running enrichment score. The color scale is based on ES, scaling from 0 (White) to 1.0 (Red). Source data are provided as a Source Data file.

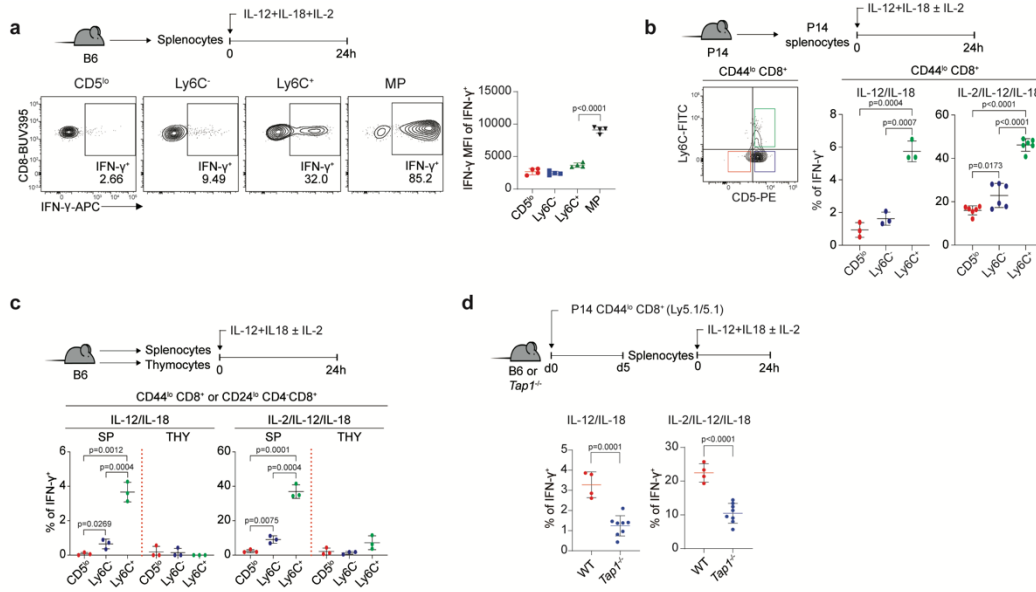

## Supplementary Figure 4

### Innate function of splenic vs. thymic subsets of naive CD8<sup>+</sup> T cells

**a**, IFN- $\gamma$  production of B6 naive CD5<sup>lo</sup>, Ly6C<sup>-</sup>, and Ly6C<sup>+</sup> and MP CD8<sup>+</sup> T cells after culture with IL-12/IL-18 (n=4 mice for each group). **b**, IFN- $\gamma$  production of CD5<sup>lo</sup>, Ly6C<sup>-</sup>, and Ly6C<sup>+</sup> P14 naive CD8<sup>+</sup> T cells after culture with IL-12/IL-18 (n=3 mice for IL-12/IL-18, n=6 mice for IL-2/IL-12/IL-18). **c**, IFN- $\gamma$  production of CD5<sup>lo</sup>, Ly6C<sup>-</sup>, and Ly6C<sup>+</sup> cells in CD44<sup>lo</sup>CD8<sup>+</sup> splenocytes and CD24<sup>lo</sup>CD4<sup>-</sup>CD8<sup>+</sup> thymocytes after culture with IL-12/IL-18 (n=3 mice for each group). **d**, IFN- $\gamma$  production of P14 naive CD8<sup>+</sup> T cells that had been parked for 5 days in either WT or *Tap1*<sup>-/-</sup> hosts after culture with IL-12/IL-18 (n=4 for WT, n=8 for *Tap1*<sup>-/-</sup> mice). Statistical significance was confirmed by two-tailed unpaired Student's t-test. Results are shown as mean  $\pm$  SD. Data representative of 2-3 independent experiments. Source data are provided as a Source Data file.



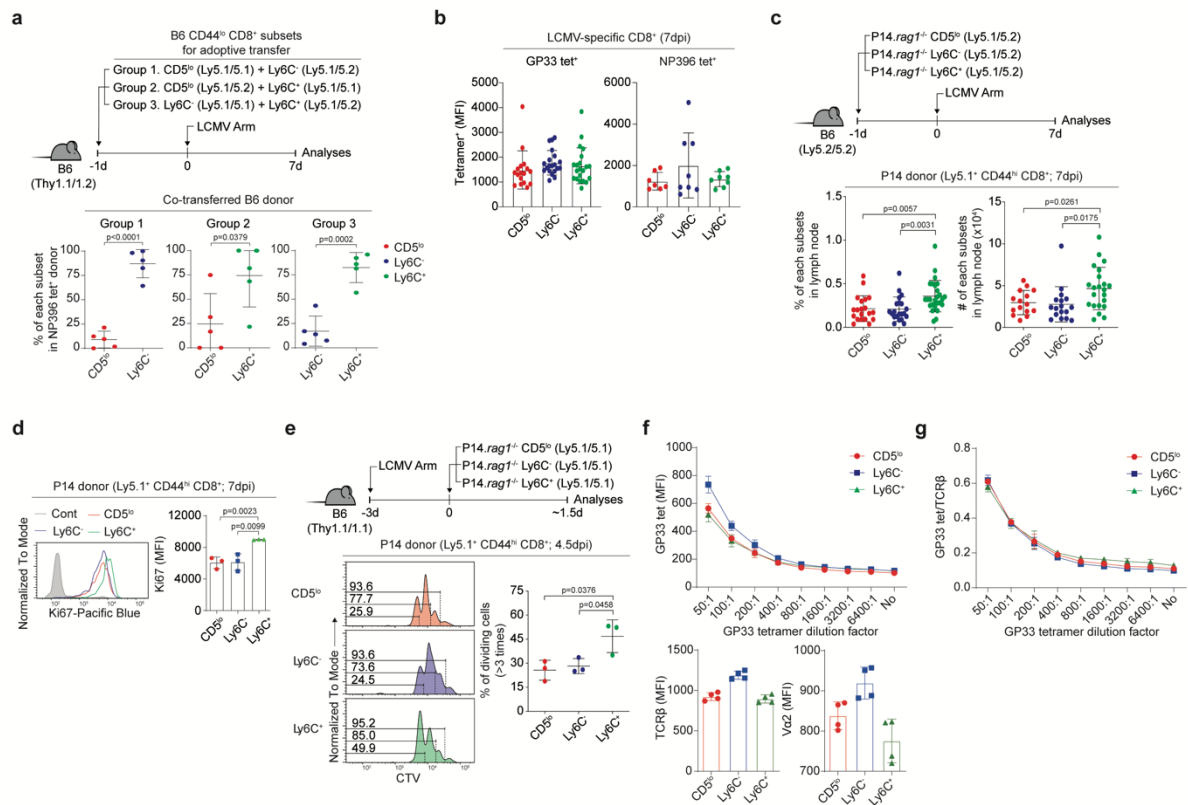

## Supplementary Figure 5

### The enhanced proliferative responses of Ly6C<sup>+</sup> cells compared to CD5<sup>lo</sup> and Ly6C<sup>-</sup> cells upon LCMV infection

**a**, Percentage of CD44<sup>hi</sup>CD8<sup>+</sup>NP396-tetramer<sup>+</sup> B6 donor cells (n=5 mice for each group). **b**, Binding intensity of GP33- (left) and NP396- (right) tetramers on CD44<sup>hi</sup> B6 donor (n=25 mice for GP33 tet<sup>+</sup>, n=8 mice for NP396 tet<sup>+</sup>). **c**, Percentage and absolute number of P14 CD44<sup>hi</sup> donor cells in LN (n=22 mice for each group). **d**, Ki67 expression on P14 CD44<sup>hi</sup> donor cells (n=3 mice for each group). **e**, CTV dilutions of P14 CD44<sup>hi</sup> donor cells at 4.5 dpi (n=3 mice for each group). **f**, Binding intensity of GP33-tetramer (upper) and expression of TCRβ (lower left) and Va2 (lower right) on CD5<sup>lo</sup>, Ly6C<sup>-</sup> and Ly6C<sup>+</sup> P14 naive CD8<sup>+</sup> T cells (n=4 mice for each group). **g**, Binding affinity of GP33-tetramer normalized by TCRβ expression (n=4 mice for each group). Statistical significance was confirmed by two-tailed unpaired Student's t-test.

Results are shown as mean  $\pm$  SD. Data representative of 2-3 independent experiments. Source data are provided as a Source Data file.

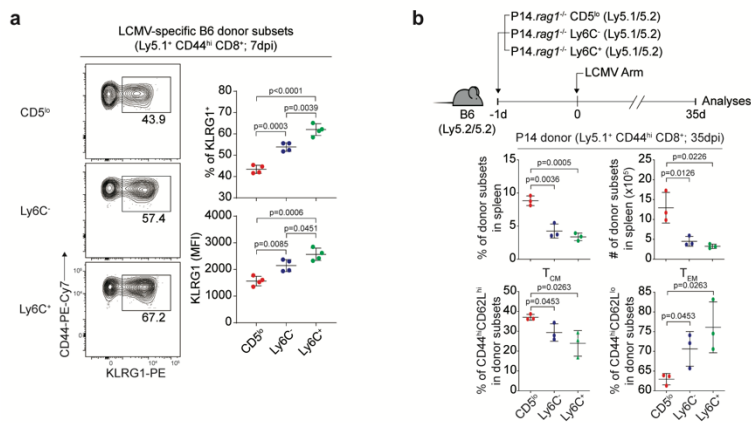

## Supplementary Figure 6

### Effector and memory differentiation of CD5<sup>lo</sup>, Ly6C<sup>-</sup>, and Ly6C<sup>+</sup> cells upon LCMV infection

**a**, Percentage of CD44<sup>hi</sup>KLRG1<sup>+</sup> donor (n=4 mice for each group). **b**, Percentage and donor recovery of P14 CD44<sup>hi</sup> donor cells (upper), and percentage of CD44<sup>hi</sup>CD62L<sup>hi</sup> and CD44<sup>hi</sup>CD62L<sup>lo</sup> P14 donor cells (bottom) at 35 dpi (n=3 mice for each group). Statistical significance was confirmed by two-tailed unpaired Student's t-test. Results are shown as mean ± SD. Data representative of 2-3 independent experiments. Source data are provided as a Source Data file.

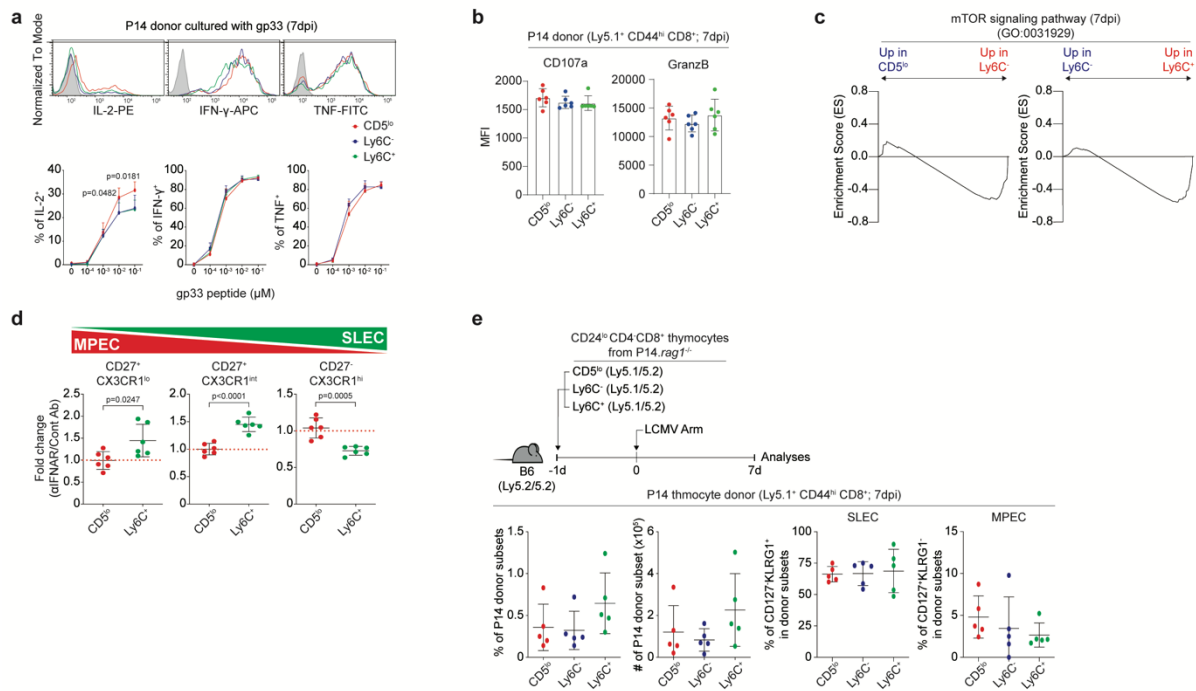

## Supplementary Figure 7

### Differentiation profiles in splenic and thymic CD5<sup>lo</sup>, Ly6C<sup>-</sup>, and Ly6C<sup>+</sup> cells upon LCMV infection

**a**, IL-2, IFN- $\gamma$ , and TNF production of P14 CD44<sup>hi</sup> donor cells stimulated by gp33 peptide (n=6 mice for each group). **b**, CD107a (left) and Granzyme B (right) expression on P14 CD44<sup>hi</sup> donor cells (n=6 mice for each group). **c**, GSEA results between CD5<sup>lo</sup> and Ly6C<sup>+</sup> cells or Ly6C<sup>-</sup> and Ly6C<sup>+</sup> P14 CD44<sup>hi</sup> donor cells for pathway “mTOR signaling pathway”. **d**, Fold change of CD27<sup>+</sup>CX3CR1<sup>lo</sup>, CD27<sup>+</sup>CX3CR1<sup>int</sup>, and CD27<sup>+</sup>CX3CR1<sup>hi</sup> cells between donor cells previously treated with Control Ab or IFNAR Ab (n=6 mice for each group). **e**, Percentage and donor recovery (left) and percentage of CD127<sup>+</sup>KLRG1<sup>+</sup> and CD127<sup>+</sup>KLRG1<sup>-</sup> cells (right) of P14 thymic donors (n=5 mice for each group). Statistical significance was confirmed by two-tailed unpaired Student’s t-test. Results are shown as mean  $\pm$  SD. Data representative of 2-3 independent experiments. Source data are provided as a Source Data file.

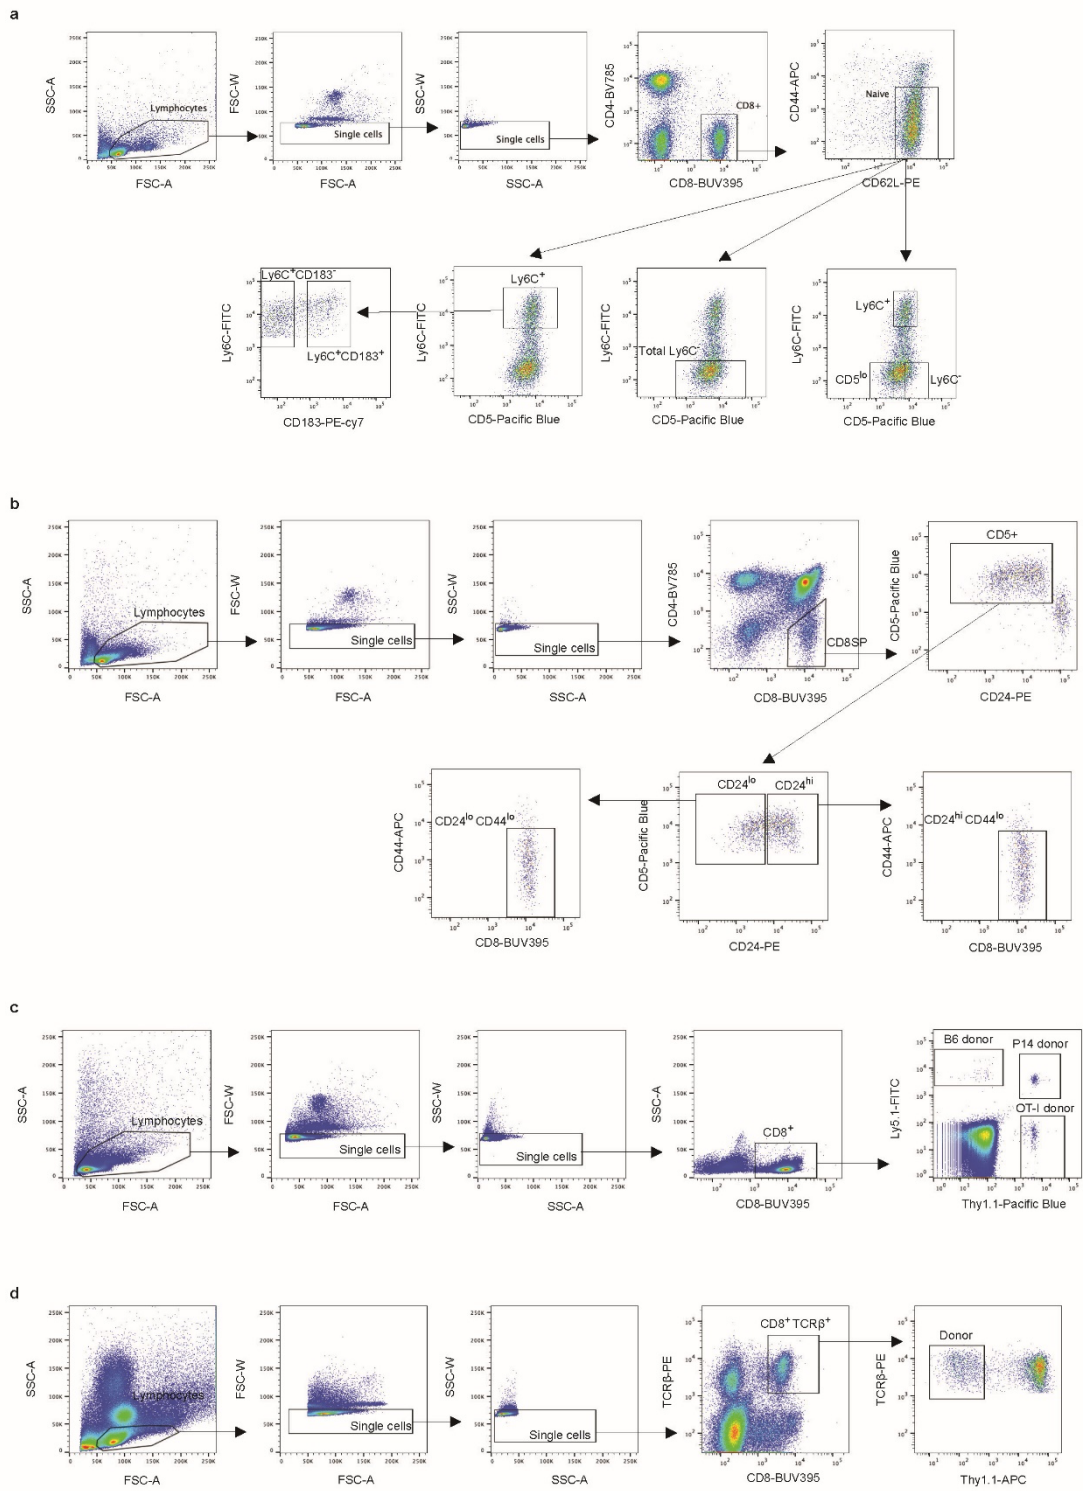

e

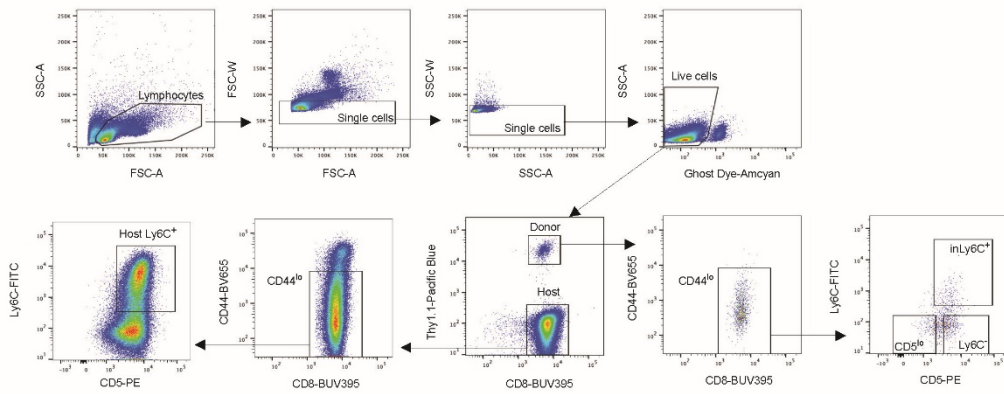

f

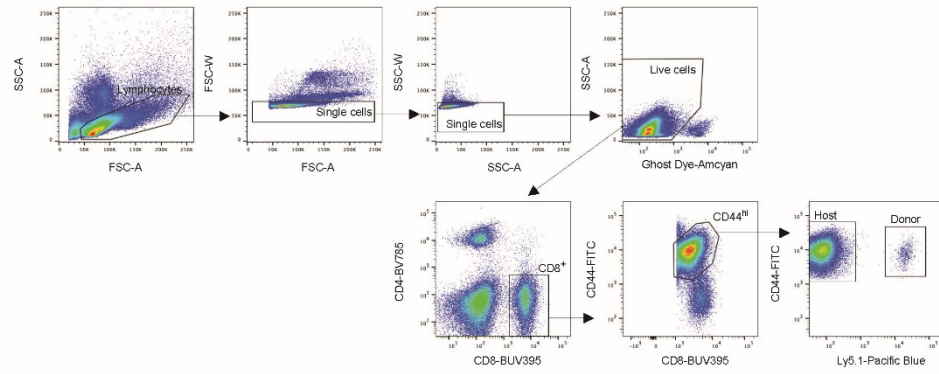

g

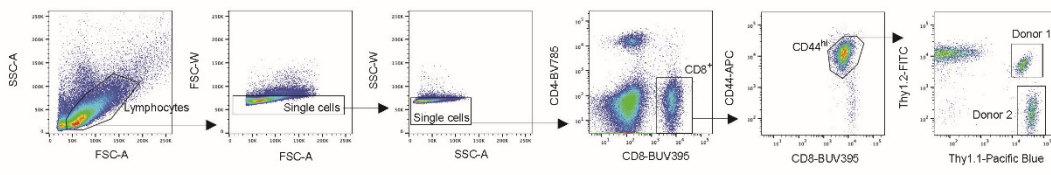

h

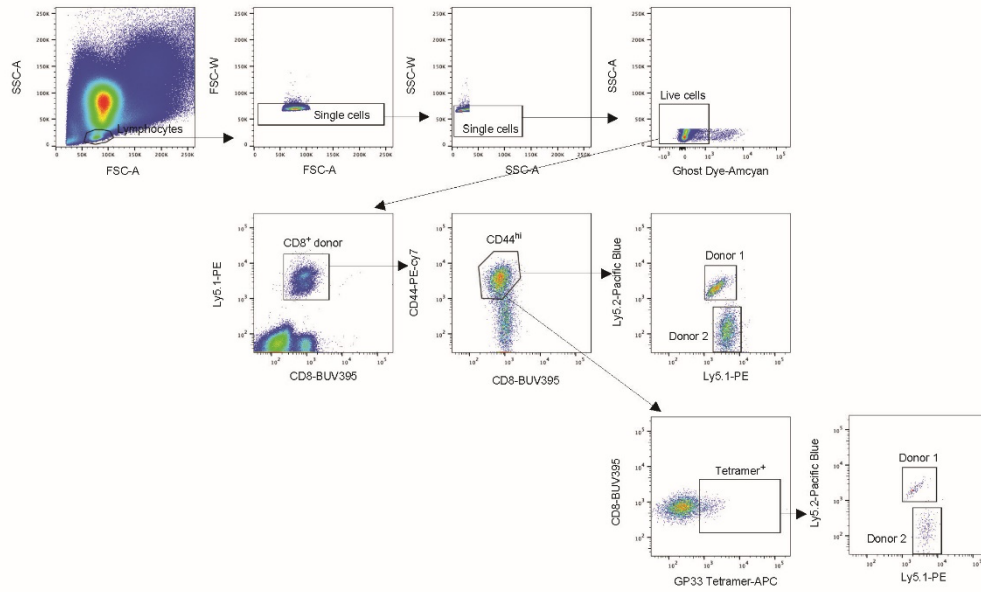

Supplementary Figure 8

## **Gating strategies**

**a**, Gating strategy for Figures 1b, 1c, 1e, 1f, 2a, 2c, 2e, 2f, 4a, 4b, and 4d. **b**, Gating strategy for Figures 1d, 1e, and 1f. **c**, Gating strategy for Figure 2j. **d**, Gating strategy for Figure 2i. **e**, Gating strategy for Figure 4c. **f**, Gating strategy for Figures 5d, 5e, 5f, 6b, 6c, 6f, 6g, 6h, 7b, and 7c. **g**, Gating strategy for Figures 5b, 5c, 7f, and 7e. **h**, Gating strategy for Figure 5a.

| Immgen Cluster                                       | # of genes in cluster | # of core enrichment genes<br>(CD5 <sup>+</sup> vs Ly6C <sup>-</sup> , CD5 <sup>+</sup> vs Ly6C <sup>+</sup> , Ly6C <sup>-</sup> vs Ly6C <sup>+</sup> ) | Expected # of IFN- $\beta$ regulated core enrichment genes<br>(CD5 <sup>+</sup> vs Ly6C <sup>-</sup> , CD5 <sup>+</sup> vs Ly6C <sup>+</sup> , Ly6C <sup>-</sup> vs Ly6C <sup>+</sup> ) | Actual # of IFN- $\beta$ regulated core enrichment genes                                                                  |
|------------------------------------------------------|-----------------------|---------------------------------------------------------------------------------------------------------------------------------------------------------|-----------------------------------------------------------------------------------------------------------------------------------------------------------------------------------------|---------------------------------------------------------------------------------------------------------------------------|
|                                                      |                       |                                                                                                                                                         |                                                                                                                                                                                         | (CD5 <sup>+</sup> vs Ly6C <sup>-</sup> , CD5 <sup>+</sup> vs Ly6C <sup>+</sup> , Ly6C <sup>-</sup> vs Ly6C <sup>+</sup> ) |
| Cluster I<br>(Initial cytokine or effector response) | 16                    | 5, 7, 2                                                                                                                                                 | 0.51, 0.71, 0.2                                                                                                                                                                         | 5, 7, 2<br>p=0.0011, p=0.0011, p=0.0104                                                                                   |
| Cluster II<br>(Preparation for cell division)        | 149                   | 59, 72, 56                                                                                                                                              | 6.02, 7.35, 5.72                                                                                                                                                                        | 3, 3, 2                                                                                                                   |
| Cluster III<br>(Cell cycle & division)               | 155                   | 87, 59, 67                                                                                                                                              | 8.88, 6.02, 6.84                                                                                                                                                                        | 32, 24, 17<br>p=0.0005, p=0.0005, p=0.0008                                                                                |
| Cluster IV<br>(Naive and late memory)                | 5                     | 3, 2, 3                                                                                                                                                 | 0.3, 0.2, 0.3                                                                                                                                                                           | 1, 1, 1                                                                                                                   |
| Cluster V<br>(Early effector, late memory)           | 16                    | 12, 14, 13                                                                                                                                              | 1.22, 1.43, 1.32                                                                                                                                                                        | 0, 0, 0                                                                                                                   |
| Cluster VI<br>(Short-term effector and memory)       | 34                    | 3, 6, 7                                                                                                                                                 | 0.3, 0.61, 0.71                                                                                                                                                                         | 1, 2, 4<br>p=0.0029                                                                                                       |
| Cluster VII<br>(Memory precursor)                    | 29                    | 10, 7, 7                                                                                                                                                | 1.02, 0.71, 0.71                                                                                                                                                                        | 3, 3, 3                                                                                                                   |
| Cluster VIII<br>(Naive or late effector or memory)   | 76                    | 14, 21, 31                                                                                                                                              | 1.43, 2.14, 3.16                                                                                                                                                                        | 1, 3, 5                                                                                                                   |
| Cluster IX<br>(Short-term effector or memory)        | 7                     | 3, 4, 2                                                                                                                                                 | 0.3, 0.4, 0.2                                                                                                                                                                           | 0, 2, 0                                                                                                                   |
| Cluster X<br>(Late effector or memory)               | 16                    | 5, 5, 7                                                                                                                                                 | 0.51, 0.51, 0.71                                                                                                                                                                        | 1, 1, 1                                                                                                                   |

## Supplementary Table 1

### Influence of IFN- $\beta$ on core enrichment genes of Immgen clusters

Influence of IFN- $\beta$  on core enrichment genes of Immgen clusters between CD5<sup>lo</sup> and Ly6C<sup>-</sup>, CD5<sup>lo</sup> and Ly6C<sup>+</sup>, or Ly6C<sup>-</sup> and Ly6C<sup>+</sup> naive B6 CD8<sup>+</sup> T cells. P-values are calculated using Eq.2 and shown above the values of actual number of IFN- $\beta$  regulated core enrichment genes.



| Name                        | Company                     | Clone      | Catalogue No. | Application    | Dilution |
|-----------------------------|-----------------------------|------------|---------------|----------------|----------|
| anti-CD103                  | Biolegend                   | 2E7        | 121414        | Flow cytometry | 1:400    |
| anti-CD107a                 | Biolegend                   | 1D4B       | 121614        | Flow cytometry | 1:400    |
| anti-CD122                  | Biolegend                   | 5H4        | 105912        | Flow cytometry | 1:400    |
| anti-CD122                  | Biolegend                   | TM-β1      | 123214        | Flow cytometry | 1:400    |
| anti-CD123                  | Biolegend                   | 6H6        | 306014        | Flow cytometry | 1:400    |
| anti-CD124                  | Biolegend                   | I015F8     | 144807        | Flow cytometry | 1:400    |
| anti-CD126                  | Biolegend                   | D7715A7    | 115812        | Flow cytometry | 1:400    |
| anti-CD127                  | Biolegend                   | A7R34      | 135008        | Flow cytometry | 1:400    |
| anti-CD130                  | eBiosciences                | KGP130     | 15536876      | Flow cytometry | 1:400    |
| anti-CD132                  | Biolegend                   | TUGm2      | 132308        | Flow cytometry | 1:400    |
| anti-CD183                  | Biolegend                   | CXCR3-173  | 126506        | Flow cytometry | 1:400    |
| anti-CD24                   | Biolegend                   | M1/69      | 101806        | Flow cytometry | 1:400    |
| anti-CD25                   | Invitrogen                  | PC81.5     | 16370834      | Flow cytometry | 1:400    |
| anti-CD27                   | Biolegend                   | O323       | 302806        | Flow cytometry | 1:400    |
| anti-CD28                   | Biolegend                   | 37.51      | 102110        | Flow cytometry | 1:400    |
| anti-CD38                   | Biolegend                   | 90         | 102708        | Flow cytometry | 1:400    |
| anti-CD3ε                   | Biolegend                   | 145-2C11   | 100334        | Flow cytometry | 1:400    |
| anti-CD4                    | Biolegend                   | RM4-5      | 100510        | Flow cytometry | 1:400    |
| anti-CD44                   | Biolegend                   | IM7        | 103020        | Flow cytometry | 1:400    |
| anti-CD45.1                 | BD Biosciences              | A20        | 565212        | Flow cytometry | 1:400    |
| anti-CD45.2                 | Biolegend                   | 104        | 109820        | Flow cytometry | 1:400    |
| anti-CD45RA                 | BD Biosciences              | 14.8       | 564360        | Flow cytometry | 1:400    |
| anti-CD45RB                 | Biolegend                   | C363.16A   | 103305        | Flow cytometry | 1:400    |
| anti-CD5                    | Biolegend                   | 53-7.3     | 100642        | Flow cytometry | 1:400    |
| anti-CD62L                  | Biolegend                   | MEL-14     | 104408        | Flow cytometry | 1:400    |
| anti-CD8α                   | Tonbo                       | 53-6.7     | 20-0081-U100  | Flow cytometry | 1:400    |
| anti-CD90.1                 | eBiosciences                | HIS51      | 15238149      | Flow cytometry | 1:400    |
| anti-CD90.2                 | eBiosciences                | 53-2.1     | 15298609      | Flow cytometry | 1:400    |
| anti-CD98                   | eBiosciences                | RL388      | 15218629      | Flow cytometry | 1:400    |
| anti-CX3CR1                 | Biolegend                   | 2A9-1      | 341610        | Flow cytometry | 1:400    |
| anti-GITR                   | Biolegend                   | DTA-1      | 126308        | Flow cytometry | 1:400    |
| anti-Granzyme B             | Biolegend                   | GB11       | 515406        | Flow cytometry | 1:200    |
| anti-IFNAR1                 | SinoBiological              | 110        | 50469-R110-P  | Flow cytometry | 1:400    |
| anti-IFNAR2                 | R&D Systems                 | Polyclonal | FAB1083A      | Flow cytometry | 1:400    |
| anti-IFN-γ                  | Biolegend                   | XMG1.2     | 505814        | Flow cytometry | 1:200    |
| anti-IL-2                   | Biolegend                   | JES6-5H4   | 503810        | Flow cytometry | 1:200    |
| anti-Ki-67                  | eBiosciences                | SolA15     | 15268809      | Flow cytometry | 1:200    |
| anti-KLRG1                  | Biolegend                   | 2F1/KLRG1  | 138412        | Flow cytometry | 1:400    |
| anti-Ly6C                   | eBiosciences                | HK1.4      | 15518606      | Flow cytometry | 1:400    |
| anti-Nur77                  | Invitrogen                  | 12.14      | 12-5965-82    | Flow cytometry | 1:200    |
| anti-TCRβ                   | Biolegend                   | H57-597    | 109226        | Flow cytometry | 1:400    |
| anti-TNF                    | Biolegend                   | MP6-XT22   | 506314        | Flow cytometry | 1:200    |
| anti-Vα11.1/11.2            | Biolegend                   | RR8-1      | 139904        | Flow cytometry | 1:400    |
| anti-Vα2                    | eBiosciences                | B20.1      | 15248269      | Flow cytometry | 1:400    |
| anti-Vα3.2                  | eBiosciences                | RR3-16     | 15556566      | Flow cytometry | 1:400    |
| anti-Vα8.3                  | Biolegend                   | KT50       | 125707        | Flow cytometry | 1:400    |
| anti-Vβ10b                  | BD Biosciences              | B21.5      | 553284        | Flow cytometry | 1:400    |
| anti-Vβ11                   | BD Biosciences              | RR3-15     | 553196        | Flow cytometry | 1:400    |
| anti-Vβ11.1/11.2            | Biolegend                   | RR8-1      | 139904        | Flow cytometry | 1:400    |
| anti-Vβ12                   | Biolegend                   | MR11-1     | 139704        | Flow cytometry | 1:400    |
| anti-Vβ13                   | BD Biosciences              | MR12-3     | 561541        | Flow cytometry | 1:400    |
| anti-Vβ14                   | BD Biosciences              | 14-2       | 553258        | Flow cytometry | 1:400    |
| anti-Vβ17a                  | BD Biosciences              | KJ23       | 553212        | Flow cytometry | 1:400    |
| anti-Vβ2                    | Biolegend                   | B20.6      | 127906        | Flow cytometry | 1:400    |
| anti-Vβ3                    | BD Biosciences              | KJ25       | 553208        | Flow cytometry | 1:400    |
| anti-Vβ4                    | BD Biosciences              | KT4        | 553365        | Flow cytometry | 1:400    |
| anti-Vβ5.1/5.2              | eBiosciences                | MR9-4      | 16380614      | Flow cytometry | 1:400    |
| anti-Vβ6                    | eBiosciences                | RR4-7      | 15300760      | Flow cytometry | 1:400    |
| anti-Vβ7                    | Biolegend                   | TR310      | 118306        | Flow cytometry | 1:400    |
| anti-Vβ8                    | BD Biosciences              | F23.1      | 553861        | Flow cytometry | 1:400    |
| anti-Vβ8.3                  | BD Biosciences              | 1B3.3      | 553663        | Flow cytometry | 1:400    |
| anti-Vβ9                    | BD Biosciences              | MR10-2     | 553201        | Flow cytometry | 1:400    |
| anti-β2                     | Biolegend                   | M18/2      | 101408        | Flow cytometry | 1:400    |
| anti-β7                     | Biolegend                   | FIB504     | 321208        | Flow cytometry | 1:400    |
| GP33-tetramer               | Immudex                     |            | JA2142-APC    | Flow cytometry | 1:50     |
| NP396 tetramer              | Immudex                     |            | JA2160-APC    | Flow cytometry | 1:50     |
| anti-phospho-STAT1 (Tyr701) | Cell Signaling Technologies | 58D6       | 9167          | Western blot   | 1:1000   |
| anti-phospho-STAT2 (Tyr690) | Cell Signaling Technologies | D3P2P      | 88410         | Western blot   | 1:1000   |
| anti-b-actin                | Sigma-Aldrich               | AC-15      | A1978-200UL   | Western blot   | 1:5000   |
| m-IgGκ BP-HRP               | Santa Cruz Biotechnology    |            | sc-516102     | Western blot   | 1:1000   |
| goat anti-rabbit IgG-HRP    | Santa Cruz Biotechnology    |            | sc-2004       | Western blot   | 1:1000   |

## Supplementary Table 2

### Antibodies and reagents

| <b>Name</b> | <b>Company</b>     | <b>Assay ID</b> | <b>Exon Boundary</b> | <b>Amplicon Length</b> | <b>Applications</b> |
|-------------|--------------------|-----------------|----------------------|------------------------|---------------------|
| Ly6C2       | Applied Biosystems | Mm00841873_m1   | 1-2                  | 162                    | Real-time PCR       |
| Tbx21       | Applied Biosystems | Mm00450960_m1   | 1-2                  | 69                     | Real-time PCR       |
| Eomes       | Applied Biosystems | Mm01351984_m1   | 1-2                  | 78                     | Real-time PCR       |
| Il18rap     | Applied Biosystems | Mm00516053_m1   | 9-10                 | 113                    | Real-time PCR       |
| Ccl5        | Applied Biosystems | Mm01302427_m1   | 1-2                  | 103                    | Real-time PCR       |

## Supplementary Table 3

### Primers
