# Supplementary material for: Self-reactivity controls functional diversity of naive CD8+ T cells by co-opting tonic type I interferon
Source: PubMed Central journal article supplement (PMC8523551; doi:10.1038/s41467-021-26351-3), 2021-10-18
Supplement: 41467_2021_26351_MOESM3_ESM.pdf [file 41467_2021_26351_MOESM3_ESM.pdf]

## Reporting Summary

Nature Portfolio wishes to improve the reproducibility of the work that we publish. This form provides structure for consistency and transparency in reporting. For further information on Nature Portfolio policies, see our [Editorial Policies](#) and the [Editorial Policy Checklist](#).

### Statistics

For all statistical analyses, confirm that the following items are present in the figure legend, table legend, main text, or Methods section.

- |     |           |
|-----|-----------|
| n/a | Confirmed |
|-----|-----------|
- The exact sample size ( $n$ ) for each experimental group/condition, given as a discrete number and unit of measurement
  - A statement on whether measurements were taken from distinct samples or whether the same sample was measured repeatedly
  - The statistical test(s) used AND whether they are one- or two-sided  
*Only common tests should be described solely by name; describe more complex techniques in the Methods section.*
  - A description of all covariates tested
  - A description of any assumptions or corrections, such as tests of normality and adjustment for multiple comparisons
  - A full description of the statistical parameters including central tendency (e.g. means) or other basic estimates (e.g. regression coefficient) AND variation (e.g. standard deviation) or associated estimates of uncertainty (e.g. confidence intervals)
  - For null hypothesis testing, the test statistic (e.g.  $F$ ,  $t$ ,  $r$ ) with confidence intervals, effect sizes, degrees of freedom and  $P$  value noted  
*Give  $P$  values as exact values whenever suitable.*
  - For Bayesian analysis, information on the choice of priors and Markov chain Monte Carlo settings
  - For hierarchical and complex designs, identification of the appropriate level for tests and full reporting of outcomes
  - Estimates of effect sizes (e.g. Cohen's  $d$ , Pearson's  $r$ ), indicating how they were calculated

*Our web collection on [statistics for biologists](#) contains articles on many of the points above.*

### Software and code

Policy information about [availability of computer code](#)

Data collection  
Flow cytometry - BD Bioscience FACSDiva 7.0  
Quantitative Real-time PCR - StepOne Software 2.2.2  
Metabolic Assay - Seahorse Wave Controller Software 2.4.2

Data analysis  
TreeStar FlowJo 10.6.2  
GraphPad Prism 8.4.1  
Broad Institute Gene Set Enrichment Analysis version 4.0.1  
Seahorse Wave Desktop version 2.2.0.276

For manuscripts utilizing custom algorithms or software that are central to the research but not yet described in published literature, software must be made available to editors and reviewers. We strongly encourage code deposition in a community repository (e.g. GitHub). See the Nature Portfolio [guidelines for submitting code & software](#) for further information.

### Data

Policy information about [availability of data](#)

All manuscripts must include a [data availability statement](#). This statement should provide the following information, where applicable:

- Accession codes, unique identifiers, or web links for publicly available datasets
- A description of any restrictions on data availability
- For clinical datasets or third party data, please ensure that the statement adheres to our [policy](#)

RNA-Seq data and Microarray data have been deposited in the NCBI's Gene Expression Omnibus (GEO) database under the primary accession numbers GSE178445,

GSE178447, GSE178448, and GSE178449. The datasets generated during the current study are available from the corresponding author (JHC) upon request. The authors declare that all data supporting the findings of this study are available within the paper. Source data are provided with this paper.

## Field-specific reporting

Please select the one below that is the best fit for your research. If you are not sure, read the appropriate sections before making your selection.

Life sciences  Behavioural & social sciences  Ecological, evolutionary & environmental sciences

For a reference copy of the document with all sections, see [nature.com/documents/nr-reporting-summary-flat.pdf](https://www.nature.com/documents/nr-reporting-summary-flat.pdf)

## Life sciences study design

All studies must disclose on these points even when the disclosure is negative.

|                 |                                                                                                                                                                                                                                                                                                                                                                                                                                                    |
|-----------------|----------------------------------------------------------------------------------------------------------------------------------------------------------------------------------------------------------------------------------------------------------------------------------------------------------------------------------------------------------------------------------------------------------------------------------------------------|
| Sample size     | Group sizes were determined on the basis of preliminary experiments and were found sufficient to reveal biologically relevant differences among the samples of interest.                                                                                                                                                                                                                                                                           |
| Data exclusions | No data were excluded from the analyses.                                                                                                                                                                                                                                                                                                                                                                                                           |
| Replication     | All experiments were repeated at least twice and gave comparable results each time.                                                                                                                                                                                                                                                                                                                                                                |
| Randomization   | Mice were allocated to experimental groups based on sex and age matched within experiments.                                                                                                                                                                                                                                                                                                                                                        |
| Blinding        | Investigators were not blinded to group allocation. Since most experiments were done by one investigator, the investigator needed to know the exact condition of the experimenting mice. To avoid bias of the investigator, all mice were bred and experimented on the same day with the same procedures, analysis were carried out with authorized softwares using strict standards (e.g. gating strategy). Therefore, no blinding was necessary. |

## Reporting for specific materials, systems and methods

We require information from authors about some types of materials, experimental systems and methods used in many studies. Here, indicate whether each material, system or method listed is relevant to your study. If you are not sure if a list item applies to your research, read the appropriate section before selecting a response.

### Materials & experimental systems

| n/a                                 | Involved in the study                                           |
|-------------------------------------|-----------------------------------------------------------------|
| <input type="checkbox"/>            | <input checked="" type="checkbox"/> Antibodies                  |
| <input checked="" type="checkbox"/> | <input type="checkbox"/> Eukaryotic cell lines                  |
| <input checked="" type="checkbox"/> | <input type="checkbox"/> Palaeontology and archaeology          |
| <input type="checkbox"/>            | <input checked="" type="checkbox"/> Animals and other organisms |
| <input checked="" type="checkbox"/> | <input type="checkbox"/> Human research participants            |
| <input checked="" type="checkbox"/> | <input type="checkbox"/> Clinical data                          |
| <input checked="" type="checkbox"/> | <input type="checkbox"/> Dual use research of concern           |

### Methods

| n/a                                 | Involved in the study                              |
|-------------------------------------|----------------------------------------------------|
| <input checked="" type="checkbox"/> | <input type="checkbox"/> ChIP-seq                  |
| <input type="checkbox"/>            | <input checked="" type="checkbox"/> Flow cytometry |
| <input checked="" type="checkbox"/> | <input type="checkbox"/> MRI-based neuroimaging    |

## Antibodies

### Antibodies used

#### Antibody (clone), Manufacturer, Cat#

anti-CD45RA (HI100), Biolegend, 304108  
 anti-CD45RB (C363.16A), Biolegend, 103308  
 anti-CD124 (X2/45-12), eBioscience, 14-1249-82  
 anti-V $\alpha$ 2 (B20.1), BD Pharmagen, 553288  
 anti-V $\alpha$ 3.2 (RR3-16), Biolegend, 135404  
 anti-V $\alpha$ 8.3 (KT50), Biolegend, 125707  
 anti-V $\alpha$ 11.1/11.2 (RR8-1), Biolegend, 139904  
 anti-V $\beta$ 2 (B20.6), Biolegend, 127906  
 anti-V $\beta$ 3 (KJ25), BD Pharmagen, 553208  
 anti-V $\beta$ 4 (KT4), BD Pharmagen, 553365  
 anti-V $\beta$ 5.1/5.2 (MR9-4), BD Pharmagen, 562087  
 anti-V $\beta$ 6 (RR4-7), BD Pharmagen, 553193  
 anti-V $\beta$ 7 (TR310), BD Pharmagen, 553215  
 anti-V $\beta$ 8 (F23.1), BD Pharmagen, 553861  
 anti-V $\beta$ 8.3 (1B3.3), BD Pharmagen, 553663  
 anti-V $\beta$ 9 (MR10-2), BD Pharmagen, 553201  
 anti-V $\beta$ 10 (B21.5), BD Pharmagen, 553284

anti-V $\beta$ 10b (B21.5), BD Pharmagen, 553284  
 anti-V $\beta$ 11 (RR3-15), BD Pharmagen, 553197  
 anti-V $\beta$ 11.1/11.2 (RR8-1), BD Pharmagen, 553222  
 anti-V $\beta$ 12 (MR11-1), BD Pharmagen, 553300  
 anti-V $\beta$ 13 (MR12-3), BD Pharmagen, 553204  
 anti-V $\beta$ 14 (14-2), BD Pharmagen, 553258  
 anti-V $\beta$ 17a (KJ23), BD Pharmagen, 553212  
 anti-Granzyme B (GB11), BD Pharmagen, 560211  
 anti-CD107a (1D4B), BD Pharmagen, 558661  
 anti-CD3 $\epsilon$  (145-2C11), Biolegend, 100312  
 anti-CD4 (RM4-5), Biolegend, 100530  
 anti-CD5 (53-7.3), Biolegend, 100618  
 anti-CD25 (PC61.5), BD Pharmagen, 557658  
 anti-CD27 (O323), Biolegend, 302806  
 anti-CD28 (37.51), Biolegend, 102110  
 anti-CD38 (90), Biolegend, 102712  
 anti-CD44 (IM7), Biolegend, 103030  
 anti-CD103 (2E7), Biolegend, 121422  
 anti-CX3CR1 (2A9-1), Biolegend, 341610  
 anti-IFN- $\gamma$  (XMG1.2), Biolegend, 505830  
 anti-IL-2 (JES6-5H4), Biolegend, 503810  
 anti-TNF- $\alpha$  (MP6-XT22), Biolegend, 506313  
 anti-CD62L (MEL-14), Biolegend, 104421  
 anti-CD24 (1M/69), Biolegend, 101806  
 anti-CD45.1 (A20), Biolegend, 110743  
 anti-CD45.2 (104), Biolegend, 109832  
 anti-CD90 (5E10), Biolegend, 328108  
 anti-CD90.1 (HIS51), eBioscience, 17-0900-82  
 anti-CD90.2 (53-2.1), eBioscience, 12-0902-82  
 anti-CD98 (RL388), Biolegend, 128208  
 anti-CD122 (5H4), Biolegend, 105912  
 anti-CD122 (TM- $\beta$ 1), Biolegend, 123214  
 anti-CD123 (6H6), Biolegend, 306012  
 anti-CD126 (D7715A7), Biolegend, 115812  
 anti-CD127 (A7R34), Biolegend, 135010  
 anti-CD130 (KGP130), eBioscience, 17-1302-82  
 anti-CD132 (4G3), BD Pharmagen, 554457  
 anti-CD183 (CXCR3-173), Biolegend, 126516  
 anti-Ly6C (HK1.4), eBioscience, 17-5932-82  
 anti-TCR $\beta$  (H57-597), Biolegend, 109212  
 anti- $\beta$ 2 (TS1/18), eBioscience, MA1810  
 anti- $\beta$ 7 (FIB504), Biolegend, 321204  
 anti-GITR (DTA-1), Biolegend, 126308  
 anti-KLRG1 (2F1), Biolegend, 138408  
 anti-Ki-67 (SolA15), eBioscience, 11-5698-82  
 anti-Nur77 (12.14), eBioscience, 12-5965-82  
 anti-IFNAR1 (110), SinoBiological, 50469-R110-P  
 anti-CD8 $\alpha$  (53-6.7), Tonbo, 20-0081  
 anti-phospho-STAT1 (Tyr701) (58D6), Cell Signaling Technology, 9167  
 anti-phospho-STAT2 (Tyr690) (D3P2P), Cell Signaling Technology, 88410  
 anti-b-actin (AC-15), Sigma-Aldrich, A1978  
 GP33-tetramer, Immudex, JA2160  
 NP396 tetramer, Immudex, JA2142  
 m-IgGk BP-HRP, Santa Cruz Biotechnology, sc-516102  
 goat anti-rabbit IgG-HRP, Santa Cruz Biotechnology, sc-2004  
 anti-IFN a/b R2 (polyclonal), R&D Systems, FAB1083A  
 anti-BrdU (BU20A), invitrogen, 11-5071-42

#### Validation

All antibodies used are commercially available, and were validated with mouse for western blot (anti-phospho-STAT1, anti-phospho-STAT2, anti-b-actin, m-IgGk BP-HRP, goat anti-rabbit IgG-HRP) and flow cytometry (all the antibodies except for those used for western blot) application by the manufactures. Validation statement for each antibody is provided on manufacture's websites.

## Animals and other organisms

Policy information about [studies involving animals](#); [ARRIVE guidelines](#) recommended for reporting animal research

#### Laboratory animals

C57BL/6 (B6), B6.SJL (Ly5.1) and B6.PL (Thy1.1) mice were purchased from The Jackson Laboratory.  
 P14, OT-I Thy1.1, Tap1 $^{-/-}$ , Rag1 $^{-/-}$ , Ifnar $^{-/-}$ , Ifnar1 $^{-/-}$ , Ifngr $^{-/-}$ , and Stat1 $^{-/-}$  mice (all on a B6 background) were obtained from POSTECH.  
 P14.Rag1 $^{-/-}$  Ly5.1 and P14.Rag1 $^{-/-}$  Thy1.1 mice were generated by crossing P14 mice with Rag1 $^{-/-}$  and B6.SJL or B6.PL mice.  
 Mice were maintained under specific pathogen-free conditions.  
 Germ-free (GF) and antigen-free (AF) mice are maintained sterilely at POSTECH Biotech Center.  
 Unless described otherwise, all mice were used sex-matched at 8-12 weeks of age, according to protocols approved by the Animal Experimental and Ethic Committee at POSTECH and Chonnam National University (CNU).  
 For experiment, only the female mice (in all strains) were used.

|                         |                                                                                                                                                                                             |
|-------------------------|---------------------------------------------------------------------------------------------------------------------------------------------------------------------------------------------|
| Wild animals            | This study did not use wild animals.                                                                                                                                                        |
| Field-collected samples | This study did not use field-collected samples.                                                                                                                                             |
| Ethics oversight        | All experiment utilizing mice were conducted and performed according to protocols approved by the Animal Experimental and Ethic Committee at POSTECH and Chonnam National University (CNU). |

Note that full information on the approval of the study protocol must also be provided in the manuscript.

## Flow Cytometry

### Plots

Confirm that:

- The axis labels state the marker and fluorochrome used (e.g. CD4-FITC).
- The axis scales are clearly visible. Include numbers along axes only for bottom left plot of group (a 'group' is an analysis of identical markers).
- All plots are contour plots with outliers or pseudocolor plots.
- A numerical value for number of cells or percentage (with statistics) is provided.

### Methodology

|                           |                                                                                                                                                                                                                                                                                                                                                                                                                                                                        |
|---------------------------|------------------------------------------------------------------------------------------------------------------------------------------------------------------------------------------------------------------------------------------------------------------------------------------------------------------------------------------------------------------------------------------------------------------------------------------------------------------------|
| Sample preparation        | Isolated mouse LN and spleen suspensions were prepared by gently pressing LN and spleen through 70µm cell strainer and washed with media. In case of spleen, to remove red blood cells, the suspension was resuspended with RBC lysis buffer for 3 min on ice, and wash with media again. The isolated single cells were prepared and stained with fluorochrome-conjugated antibodies appropriate to each experimental design indicated on method section and legends. |
| Instrument                | Samples were analyzed by FACS Canto II and LSR II (BD). Cell sorting was performed by utilizing MoFlo Astrios or XDP (Beckman coulter)                                                                                                                                                                                                                                                                                                                                 |
| Software                  | Data was collected utilizing FACSDiva software (BD) and analyzed by FlowJo (TreeStar). Statistics of data were conducted by Prism (GraphPad).                                                                                                                                                                                                                                                                                                                          |
| Cell population abundance | Cell subsets were sorted with >98% purity as controlled by remeasurement of sorted populations.                                                                                                                                                                                                                                                                                                                                                                        |
| Gating strategy           | Lymphocytes were initially gated by FSC(A)/SSC(A), followed by FSC(W/H) to exclude cell doublets. Also dead cells were gated out by utilizing with viability dye before further gating for analyses. Further detail gating strategies were indicated on each figure and legend.                                                                                                                                                                                        |

- Tick this box to confirm that a figure exemplifying the gating strategy is provided in the Supplementary Information.
